# Supplementary material for: Multi-enhancer transcriptional hubs confer phenotypic robustness
Source: eLife journal article supplement (doi:10.7554/elife.45325), 2019-07-11
Supplement: supp [file elife-45325-supp-v1.zip]

Archive with 5 entries (5 files):
- elife_poa_e45325_Figure_2_figure_supplement_1.ai
- elife_poa_e45325_Figure_4_figure_supplement_1.ai
- elife_poa_e45325_Transparent_Reporting_File.pdf
- elife_poa_e45325_Figure_3_figure_supplement_1.ai
- elife_poa_e45325_Supplementary_file_1.xlsx
