# Supplementary material for: Multi-enhancer transcriptional hubs confer phenotypic robustness
Source: eLife journal article supplement (doi:10.7554/elife.45325), 2019-07-11
Supplement: supp [file elife-45325-supp-v1.zip › elife_poa_e45325_Supplementary_file_1.xlsx]

## Sheet: Probe primers
	Target	Pair #	F/RT7	Sequence (5'-3')
	svb	1	Fwd	GTTCAGCGTTCTTTTGGCGT
			Rev+T7	GAAATTAATACGACTCACTATAGGGACTTGGTTGGCTTGGCGATA
		2	Fwd	TGCGTTTGTCAAGCCGAAAG
			Rev+T7	GAAATTAATACGACTCACTATAGGGCAGGCATGCATGATACGCAC
		3	Fwd	GGGGGCAGATATCGAAAGGG
			Rev+T7	GAAATTAATACGACTCACTATAGGGTCGAGACCGATAGTGTGGGT
		4	Fwd	GCCTGCGATCTTGATCTCGA
			Rev+T7	GAAATTAATACGACTCACTATAGGGCTCAGAACCGTCCTTTCGCT
		5	Fwd	GACTGCAACAGTTGGCCATG
			Rev+T7	GAAATTAATACGACTCACTATAGGGAGTGCAGCGAAAAAGGCAAG
		6	Fwd	CGAATGCGTGATCGGCATTT
			Rev+T7	GAAATTAATACGACTCACTATAGGGAGTGCAGCGAAAAAGGCAAG
		7	Fwd	CTGCACCCACGACTACAGTT
			Rev+T7	GAAATTAATACGACTCACTATAGGGAACTCGGCGGCAAAGTTTTC
		8	Fwd	GAAAACTTTGCCGCCGAGTT
			Rev+T7	GAAATTAATACGACTCACTATAGGGTATAGAATCGTGGGCGTGGC
		9	Fwd	GCGGTAATCCCTCAGCCTAC
			Rev+T7	GAAATTAATACGACTCACTATAGGGCGGACAGCTGCTCCAGTAAA
		10	Fwd	GTTCGGGTCAGTGTCCCAAT
			Rev+T7	GAAATTAATACGACTCACTATAGGGGCCCCGGACTATATTGTGGG
	dsRed	1	Fwd	CGCTCCTCCAAGAACGTCAT
			Rev+T7	GAAATTAATACGACTCACTATAGGTTCACGTACACCTTGGAGCC
		2	Fwd	CCGACATCCCCGACTACAAG
			Rev+T7	GAAATTAATACGACTCACTATAGGGGTGTAGTCCTCGTTGTGGG
	lacZ	1	Fwd	CGGGTAAACTGGCTCGGATT
			Rev+T7	GAAATTAATACGACTCACTATAGGGCTGTTGACTGTAGCGGCTGA
		2	Fwd	AAAAACAACTGCTGACGCCG
			Rev+T7	GAAATTAATACGACTCACTATAGGGCGGTAGGTTTTCCGGCTGAT
		3	Fwd	GAACTGCCTGAACTACCGCA
			Rev+T7	GAAATTAATACGACTCACTATAGGGGCCAACGCTTATTACCCAGC
		4	Fwd	GGCGGTGATTTTGGCGATAC
			Rev+T7	GAAATTAATACGACTCACTATAGGGGCGTACTGTGAGCCAGAGTT
		5	Fwd	TCACGAGCATCATCCTCTGC
			Rev+T7	GAAATTAATACGACTCACTATAGGGGTGGCCTGATTCATTCCCCA
		6	Fwd	ATGGGTAACAGTCTTGGCGG
			Rev+T7	GAAATTAATACGACTCACTATAGGGAGTGCAGGAGCTCGTTATCG
	gfp	1	Fwd	ATCATGGCCGACAAGCAGAA
			Rev+T7	GAAATTAATACGACTCACTATAGGGGGACTGGGTGCTCAGGTAGTG
		2	Fwd	TTCTTCAAGGACGACGGCAA
			Rev+T7	GAAATTAATACGACTCACTATAGGGGCTCGATGTTGTGGCGGATCT
		3	Fwd	AGGAGCGCACCATCTTCTTC
			Rev+T7	GAAATTAATACGACTCACTATAGGGGTTCTTCTGCTTGTCGGCCAT
		4	Fwd	TCTTCTTCAAGGACGACGGC
			Rev+T7	GAAATTAATACGACTCACTATAGGGGTCTCGTTGGGGTCTTTGCTC
		5	Fwd	ATCATGGCCGACAAGCAGAA
			Rev+T7	GAAATTAATACGACTCACTATAGGGGAACTCCAGCAGGACCATGTG
		6	Fwd	ATGGCCGACAAGCAGAAGAA
			Rev+T7	GAAATTAATACGACTCACTATAGGGGTCTCGTTGGGGTCTTTGCTC
		7	Fwd	TCAAGGAGGACGGCAACATC
			Rev+T7	GAAATTAATACGACTCACTATAGGGGTCTCGTTGGGGTCTTTGCTC
		8	Fwd	GAGCTGAAGGGCATCGACTT
			Rev+T7	GAAATTAATACGACTCACTATAGGGGAACTCCAGCAGGACCATGTG
